# Supplementary material
Source: PubMed Central journal article supplement (PMC5438598)

**Extended Data Figure 1.d (Netrin-1 and Netrin-3 Western Blotting)**

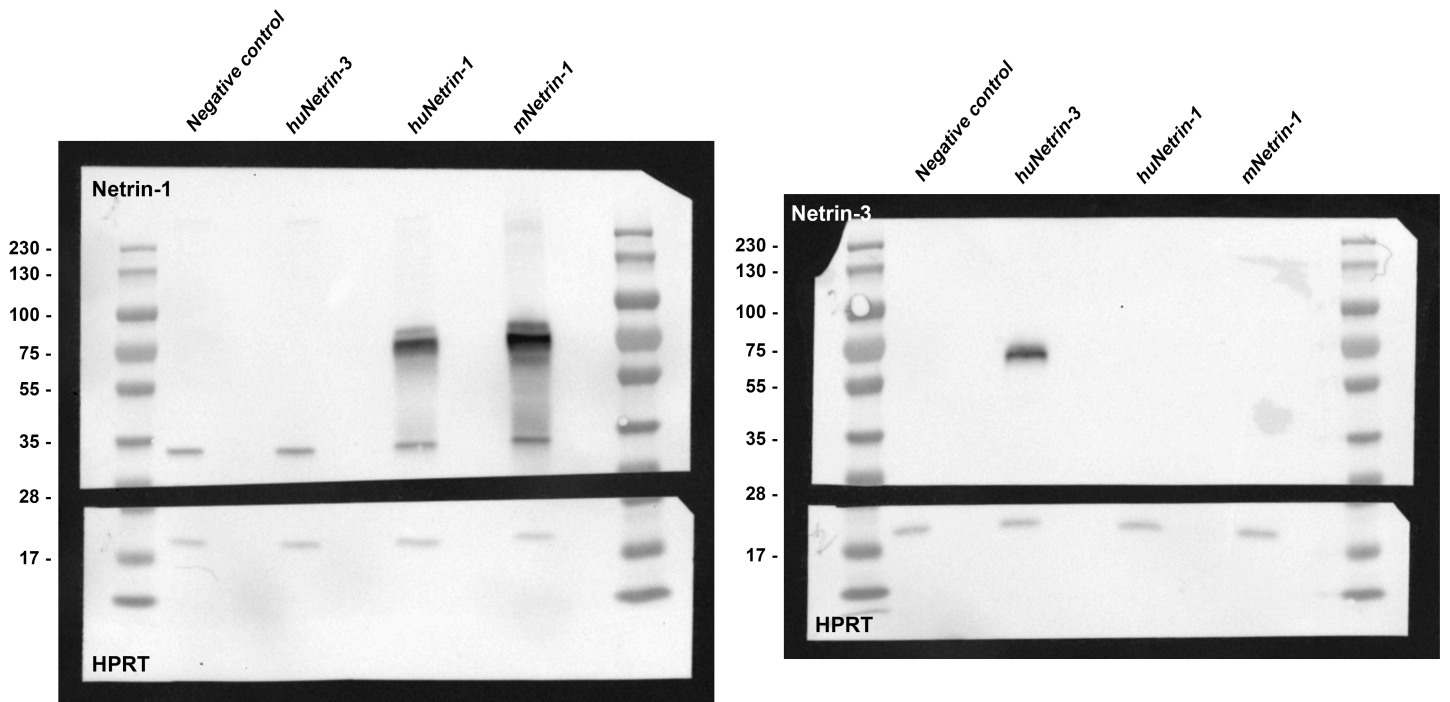

**Extended Data Figure 2.h (Netrin-1 and Slit 2 Western Blotting)**

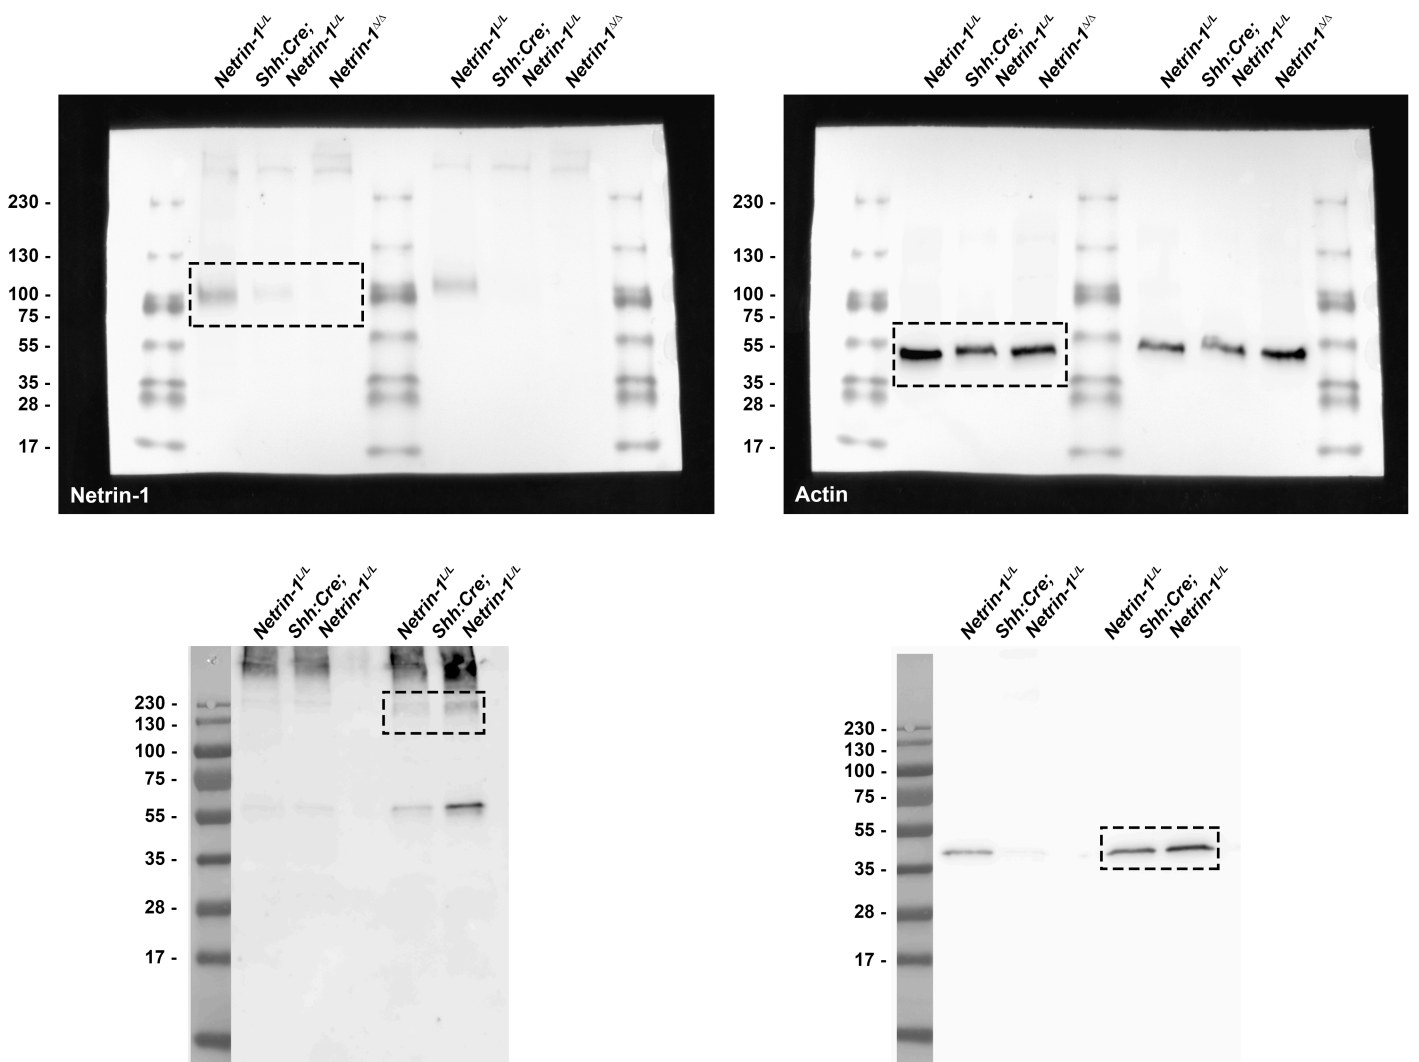

Supplement: NIHMS72181-supplement-Supplementary_Figure_1.pdf [file NIHMS72181-supplement-Supplementary_Figure_1.pdf]
